# Supplementary material for: Comparison of Acupuncture vs Sham Acupuncture or Waiting List Control in the Treatment of Aromatase Inhibitor–Related Joint Pain: A Randomized Clinical Trial
Source: PubMed Central journal article supplement (PMC9652759; doi:10.1001/jamanetworkopen.2022.41720), 2022-11-11
Supplement: jamanetwopen-e2241720-s002.pdf [file jamanetwopen-e2241720-s002.pdf]

## Supplementary Online Content

Hershman DL, Unger JM, Greenlee H, et al. Comparison of acupuncture vs sham acupuncture or waiting list control in the treatment of aromatase inhibitor–related joint pain: a randomized clinical trial. *JAMA Netw Open*. 2022;5(11):e2241720. doi:10.1001/jamanetworkopen.2022.41720

**eFigure.** CONSORT Diagram Showing the Disposition of Patients With Respect to the Examination of the Primary Endpoint, the 6-Week Breast Pain Index-Short Form (BPI-SF) Worst Pain Score

**eTable 1.** Observed and Fitted Group Mean Results for Brief Pain Inventory and PROMIS Pain Intensity Scores at Weeks 6, 12, 24, and 52 in Each Group

**eTable 2.** Determination of Best Model Fit for Longitudinal Data Analyses

**eTable 3.** Grip Strength, Maximal Contraction Over Left and Right Hand, by Randomized Arm and Time Point

**eTable 4.** Grip Strength, Change in Maximal Contraction Between Follow-up and Baseline by Randomized Arm and Time Point

**eTable 5.** Timed Get Up and Go, by Randomized Arm and Time Point

**eTable 6.** Timed Get Up and Go, Change Between Follow-up and Baseline, by Randomized Arm and Time Point

This supplementary material has been provided by the authors to give readers additional information about their work.

**eFigure.** CONSORT Diagram Showing the Disposition of Patients With Respect to the Examination of the Primary Endpoint, the 6-Week Breast Pain Index-Short Form (BPI-SF) Worst Pain Score\*

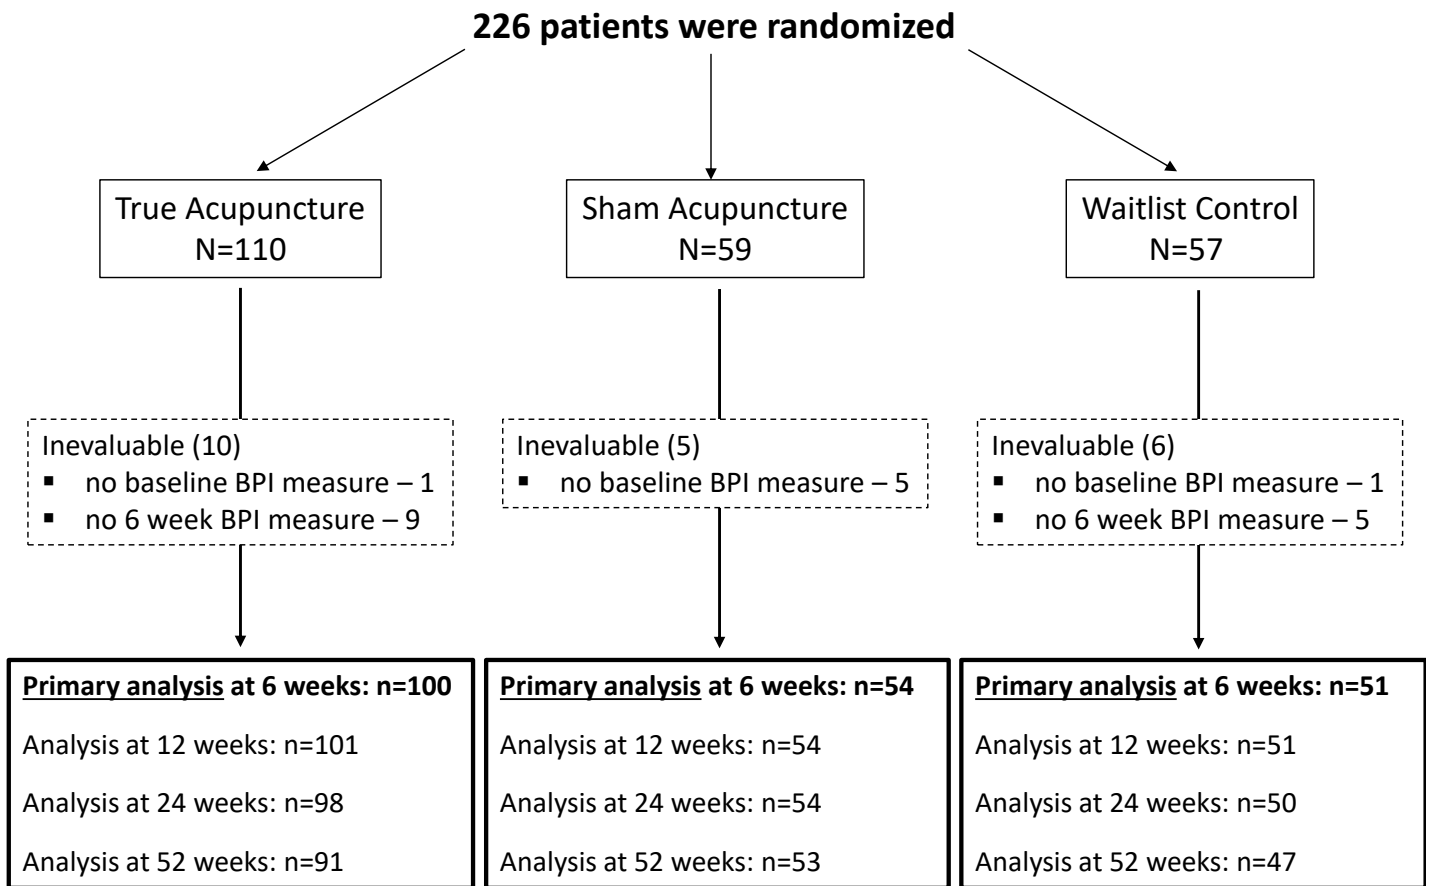

\*About 890 patients approached to participate in study

**eTable 1.** Observed and Fitted Group Mean Results for Brief Pain Inventory and PROMIS Pain Intensity Scores at Weeks 6, 12, 24, and 52 in Each Group

| FU Wk                    | N   | True Acupuncture                                    |  | Compared to Control |    |                                                     |                                      |                      |
|--------------------------|-----|-----------------------------------------------------|--|---------------------|----|-----------------------------------------------------|--------------------------------------|----------------------|
|                          |     | Observed, Baseline <sup>1</sup> v FU (Mean, 95% CI) |  | Vs. Control Arm     | N  | Observed, Baseline <sup>1</sup> v FU (Mean, 95% CI) | Model-Fitted Difference <sup>2</sup> | P-value <sup>2</sup> |
| <b>Worst Pain</b>        |     |                                                     |  |                     |    |                                                     |                                      |                      |
| 6                        | 100 | 6.84 (6.54-7.14) v 4.79 (4.36-5.22)                 |  | Sham                | 54 | 6.41 (5.98-6.82) v 5.48 (4.78-6.18)                 | 0.96 (0.23,1.68)                     | .01                  |
|                          |     |                                                     |  | Waitlist            | 51 | 6.41 (5.98-6.84) v 5.49 (4.81-6.17)                 | 0.98 (0.24,1.72)                     | .01                  |
| 12                       | 101 | 6.82 (6.52-7.12) v 4.53 (4.05-5.01)                 |  | Sham                | 54 | 6.41 (5.98-6.84) v 5.04 (4.33-5.74)                 | 0.72 (-0.05,1.48)                    | .07                  |
|                          |     |                                                     |  | Waitlist            | 51 | 6.47 (6.06-6.89) v 6.29 (5.73-6.86)                 | 1.97 (1.19,2.75)                     | <.001                |
| 24                       | 98  | 6.79 (6.49-7.10) v 4.65 (4.12-5.18)                 |  | Sham                | 54 | 6.39 (5.97-6.81) v 5.00 (4.39-5.61)                 | 0.51 (-0.30,1.33)                    | .22                  |
|                          |     |                                                     |  | Waitlist            | 50 | 6.46 (6.03-6.89) v 5.72 (5.04-6.39)                 | 1.20 (0.36,2.04)                     | <.001                |
| 52                       | 91  | 6.77 (6.45-7.08) v 4.05 (3.50-4.61)                 |  | Sham                | 53 | 6.38 (5.95-6.80) v 4.92 (4.28-5.57)                 | 1.08 (0.24,1.91)                     | .01                  |
|                          |     |                                                     |  | Waitlist            | 47 | 6.40 (5.95-6.86) v 4.85 (4.09-5.61)                 | 0.99 (0.12,1.86)                     | .03                  |
| <b>Average Pain</b>      |     |                                                     |  |                     |    |                                                     |                                      |                      |
| 6                        | 100 | 4.90 (4.57-5.23) v 3.50 (3.12-3.88)                 |  | Sham                | 54 | 4.54 (4.06-5.02) v 3.93 (3.40-3.45)                 | 0.62 (0.07,1.17)                     | .03                  |
|                          |     |                                                     |  | Waitlist            | 51 | 4.76 (4.34-5.18) v 4.14 (3.65-3.68)                 | 0.72 (0.16,1.29)                     | .01                  |
| 12                       | 101 | 4.87 (4.54-5.20) v 3.00 (2.61-3.38)                 |  | Sham                | 53 | 4.43 (3.98-4.89) v 3.62 (3.06-4.18)                 | 0.81 (0.19,1.43)                     | .01                  |
|                          |     |                                                     |  | Waitlist            | 51 | 4.76 (4.34-5.18) v 4.33 (3.80-4.87)                 | 1.39 (0.77,2.01)                     | <.001                |
| 24                       | 98  | 4.82 (4.49-5.14) v 3.27 (2.86-3.67)                 |  | Sham                | 54 | 4.52 (4.04-4.99) v 3.52 (3.02-4.02)                 | 0.37 (-0.28,1.02)                    | .26                  |
|                          |     |                                                     |  | Waitlist            | 50 | 4.80 (4.38-5.22) v 3.92 (3.29-4.55)                 | 0.65 (-0.01,1.32)                    | .05                  |
| 52                       | 91  | 4.82 (4.47-5.17) v 3.06 (2.10-3.52)                 |  | Sham                | 53 | 4.55 (4.06-5.03) v 3.23 (2.74-3.71)                 | 0.29 (-0.36,0.95)                    | .37                  |
|                          |     |                                                     |  | Waitlist            | 47 | 4.81 (4.36-5.25) v 3.08 (2.46-3.71)                 | 0.02 (-0.66,0.70)                    | .96                  |
| <b>Pain Interference</b> |     |                                                     |  |                     |    |                                                     |                                      |                      |
| 6                        | 100 | 4.24 (3.86-4.62) v 2.55 (2.11-2.98)                 |  | Sham                | 54 | 3.85 (3.34-4.37) v 3.03 (2.44-3.62)                 | 0.73 (0.11,-1.35)                    | .02                  |
|                          |     |                                                     |  | Waitlist            | 51 | 4.01(3.54-4.48) v 3.07 (2.47-3.67)                  | 0.65 (0.02,1.29)                     | .04                  |
| 12                       | 101 | 4.24 (3.86-4.62) v 2.44 (2.00-2.88)                 |  | Sham                | 54 | 3.85 (3.34-4.37) v 2.40 (1.84-2.96)                 | 0.21 (-0.40,0.81)                    | .50                  |
|                          |     |                                                     |  | Waitlist            | 51 | 4.01 (3.54-4.48) v 3.31 (2.69-3.94)                 | 1.00 (0.38,1.61)                     | .002                 |
| 24                       | 98  | 4.16 (3.77-4.56) v 2.43 (1.98-2.89)                 |  | Sham                | 54 | 3.63 (3.15-4.11) v 2.33 (1.77-2.89)                 | 0.23 (-0.41,0.86)                    | .48                  |
|                          |     |                                                     |  | Waitlist            | 50 | 4.03 (3.52-4.54) v 3.18 (2.55-3.82)                 | 0.84 (0.19,1.49)                     | .01                  |
| 52                       | 91  | 4.08 (3.67-4.49) v 2.16 (1.69-2.63)                 |  | Sham                | 53 | 3.76 (3.23-4.28) v 2.54 (2.01-3.06)                 | 0.58 (0.00,1.16)                     | .05                  |
|                          |     |                                                     |  | Waitlist            | 46 | 3.91 (3.38-3.33) v 2.38 (1.75-3.00)                 | 0.33 (-0.28,0.93)                    | .29                  |
| <b>Pain Severity</b>     |     |                                                     |  |                     |    |                                                     |                                      |                      |
| 6                        | 100 | 4.71 (4.41-5.01) v 3.21 (2.85-3.57)                 |  | Sham                | 54 | 4.75 (5.32-5.19) v 3.75 (3.21-5.28)                 | 0.55 (0.00,1.11)                     | .05                  |
|                          |     |                                                     |  | Waitlist            | 51 | 4.64 (4.25-5.03) v 3.82 (3.26-4.37)                 | 0.72 (0.15,1.29)                     | .01                  |
| 12                       | 101 | 4.71 (4.41-5.01) v 2.89 (2.52-3.26)                 |  | Sham                | 54 | 4.75 (5.32-5.19) v 3.41 (2.86-3.95)                 | 0.54 (-0.04,1.12)                    | .07                  |
|                          |     |                                                     |  | Waitlist            | 51 | 4.64 (4.25-5.03) v 4.25 (3.72-4.78)                 | 1.44 (0.85,2.04)                     | <.001                |
| 24                       | 98  | 4.59 (4.28-4.90) v 3.09 (2.97-3.50)                 |  | Sham                | 54 | 4.61 (4.16-5.05) v 3.41 (2.91-3.91)                 | 0.33 (-0.30,0.96)                    | .31                  |
|                          |     |                                                     |  | Waitlist            | 50 | 4.53 (4.13-4.92) v 3.89 (3.30-4.49)                 | 0.83 (0.19,1.48)                     | .01                  |

|                       |     |                                            |          |    |                                           |                   |       |
|-----------------------|-----|--------------------------------------------|----------|----|-------------------------------------------|-------------------|-------|
| 52                    | 91  | 4.59 (4.27-4.92) v 2.82 (2.38-3.25)        | Sham     | 53 | 4.62 (4.16-5.07) v 3.17 (2.69-3.65)       | 0.33 (-0.28,0.95) | .29   |
|                       |     |                                            | Waitlist | 47 | 4.53 (4.11-4.95) v 3.07 (2.45-3.68)       | 0.28 (-0.36,0.92) | .39   |
| Worst Stiffness       |     |                                            |          |    |                                           |                   |       |
| 6                     | 100 | 6.65 (6.26-7.04) v 4.46 (3.94-4.98)        | Sham     | 54 | 6.59 (6.03-7.16) v 5.50 (4.86-6.14)       | 1.00 (0.21,1.78)  | .01   |
|                       |     |                                            | Waitlist | 51 | 6.68 (6.26-7.10) v 5.53 (4.91-6.14)       | 1.11 (0.31,1.90)  | .007  |
| 12                    | 100 | 6.65 (6.26-7.04) v 4.35 (3.82-4.88)        | Sham     | 54 | 6.59 (6.03-7.16) v 5.07 (4.47-5.68)       | 0.73 (-0.02,1.49) | .06   |
|                       |     |                                            | Waitlist | 51 | 6.68 (6.26-7.10) v 6.12 (5.59-6.64)       | 1.80 (1.03,2.57)  | <.001 |
| 24                    | 98  | 6.61 (6.19-7.04) v 4.51 (4.02-5.00)        | Sham     | 54 | 6.52 (6.00-7.04) v 4.92 (4.31-5.32)       | 0.46 (-0.31,1.23) | .24   |
|                       |     |                                            | Waitlist | 50 | 6.62 (6.19-7.04) v 5.56 (4.88-6.23)       | 1.05 (0.25,1.84)  | .01   |
| 52                    | 91  | 6.58 (6.13-7.03) v 4.33 (3.78-4.87)        | Sham     | 53 | 6.68 (6.19-7.17) v 4.72 (3.98-5.46)       | 0.34 (-0.47,1.15) | .41   |
|                       |     |                                            | Waitlist | 46 | 6.67 (6.21-7.13) v 4.70 (3.99-5.40)       | 0.35 (-0.51,1.20) | .42   |
| PROMIS Pain Intensity |     |                                            |          |    |                                           |                   |       |
| 6                     | 101 | 61.32 (60.33-62.31) v 55.93 (54.53-57.34)  | Sham     | 54 | 59.71 (58.21-61.32) v 57.63 (56.04-59.21) | 2.75 (0.86,4.64)  | .005  |
|                       |     |                                            | Waitlist | 51 | 59.08 (57.61-60.56) v 56.68 (54.96-58.40) | 2.24 (0.30,4.18)  | .02   |
| 12                    | 102 | 61.30 (60.31-62.-28) v 54.72 (53.25-56.19) | Sham     | 54 | 59.71 (58.21-61.21) v 56.19 (54.47-57.91) | 2.58 (0.52,4.65)  | .01   |
|                       |     |                                            | Waitlist | 51 | 59.08 (57.61-60.56) v 57.41 (55.43-59.40) | 4.25 (2.13,6.37)  | <.001 |
| 24                    | 99  | 61.30 (60.27-62.34) v 55.40 (53.84-56.96)  | Sham     | 54 | 59.54 (58.10-60.98) v 54.98 (53.08-56.89) | 0.92 (-1.36,3.19) | .43   |
|                       |     |                                            | Waitlist | 50 | 59.16 (57.67-60.98) v 56.53 (54.16-58.90) | 2.75 (0.40,5.09)  | .02   |
| 52                    | 93  | 61.36 (60.35-62.37) v 54.16 (52.45-55.86)  | Sham     | 53 | 59.84 (58.34-61.35) v 55.23 (53.27-57.20) | 2.35 (0.07,4.63)  | .04   |
|                       |     |                                            | Waitlist | 48 | 59.19 (57.63-60.75) v 53.57 (51.16-55.98) | 1.28 (-1.09,3.66) | .29   |

1 – Among patients with follow-up scores

2 –From multivariable linear regression adjusting for the baseline score and the stratification factor.

**eTable 2. Determination of Best Model Fit for Longitudinal Data Analyses**

|                       | Row 1 = Fit statistic (-2 Log Likelihood), model degrees of freedom                                                                         |                                             |                                            |                                                                                                                                                                              |                             |
|-----------------------|---------------------------------------------------------------------------------------------------------------------------------------------|---------------------------------------------|--------------------------------------------|------------------------------------------------------------------------------------------------------------------------------------------------------------------------------|-----------------------------|
|                       | Row 2 = Difference in fit statistic compared to specified nested model, difference in degrees of freedom, p-value by chi-square             |                                             |                                            |                                                                                                                                                                              |                             |
|                       | Row 3 = Difference in fit statistic compared to alternative specified nested model, difference in degrees of freedom, p-value by chi-square |                                             |                                            |                                                                                                                                                                              |                             |
|                       | Function for Time in Model#                                                                                                                 |                                             |                                            |                                                                                                                                                                              |                             |
| Domain                | Linear Time, No Interaction                                                                                                                 | Linear Time, Interaction with Treatment     | Quadratic Time, No Interaction             | Quadratic Time, Interaction with Treatment                                                                                                                                   | Best Model                  |
| BPI Worst Pain        | 5022.2, 8                                                                                                                                   | 5020.1, 10<br>Vs linear time: 2.1, 2, p=.35 | 5021.0, 9<br>Vs linear time: 1.2, 1, p=.27 | 5015.6, 13<br>Vs linear time, no interaction: 6.6, 5, p=.25<br>Vs linear time, interaction with treatment: 4.5, 3, p=.21<br>Vs quadratic time, no interaction: 5.4, 4, p=.25 | Linear Time, No Interaction |
| BPI Average Pain      | 3603.3, 8                                                                                                                                   | 3602.2, 10<br>Vs linear time: 1.1, 2, p=.58 | 3603.2, 9<br>Vs linear time: 0.1, 1, p=.75 | 3601.1, 13<br>Vs linear time, no interaction: 2.2, 5, p=.82<br>Vs linear time, interaction with treatment: 1.1, 3, p=.78<br>Vs quadratic time, no interaction: 2.1, 4, p=.72 | Linear Time, No Interaction |
| BPI Pain Severity     | 3524.2, 8                                                                                                                                   | 3523.8, 10<br>Vs linear time: 0.4, 2, p=.82 | 3524.0, 9<br>Vs linear time: 0.2, 1, p=.66 | 3521.1, 13<br>Vs linear time, no interaction: 3.1, 5, p=.69<br>Vs linear time, interaction with treatment: 2.7, 3, p=.44<br>Vs quadratic time, no interaction: 2.9, 4, p=.58 | Linear Time, No Interaction |
| BPI Pain Interference | 3601.3, 8                                                                                                                                   | 3599.3, 10<br>Vs linear time: 2.0, 2, p=.37 | 3601.3, 9<br>Vs linear time: 0.0, 1, p=1.0 | 3596.3, 13<br>Vs linear time, no interaction: 5.0, 5, p=.42<br>Vs linear time, interaction with treatment: 3.0, 3, p=.39<br>Vs quadratic time, no interaction: 5.0, 4, p=.29 | Linear Time, No Interaction |
| BPI Worst Stiffness   | 4172.8, 8                                                                                                                                   | 4170.7, 10<br>Vs linear time: 2.1, 2, p=.35 | 4172.7, 9<br>Vs linear time: 0.1, 1, p=.75 | 4167.2, 13<br>Vs linear time, no interaction: 5.6, 5, p=.35<br>Vs linear time, interaction with treatment: 3.5, 3, p=.32<br>Vs quadratic time, no interaction: 5.5, 4, p=.24 | Linear Time, No Interaction |
| BPI PROMIS PI-SF      | 5722.3, 8                                                                                                                                   | 5717.2, 10<br>Vs linear time: 5.1, 2, p=.08 | 5721.7, 9<br>Vs linear time: 0.6, 1, p=.44 | 5716.3, 13<br>Vs linear time, no interaction: 6.0, 5, p=.31<br>Vs linear time, interaction with treatment: 0.9, 3, p=.83<br>Vs quadratic time, no interaction: 5.4, 4, p=.25 | Linear Time, No Interaction |

BPI = brief pain inventory; PROMIS PI-SF = Patient-Reported Outcome Measurement Information System Pain Interference – Short Form

Changes over all assessment times in the BPI worst pain endpoint were analyzed using linear mixed models, with individual patients treated as random effects. An unstructured correlation matrix was used. Covariates for longitudinal modeling included intervention arm (using indicator variables), assessment time, the baseline score, and the randomization stratification variables (site type, categorized as Columbia versus Kaiser NCORP versus West Michigan NCORP versus other sites, with Kaiser NCORP was the reference group). Additionally, the interactions of treatment with time and treatment with quadratic time were examined. Since models were nested, we compared log-likelihood values using a Chi-squared tests with appropriate degrees of freedom to determine which model provided a best data fit; if multiple models were identified, preference was given to the higher order model. The best model ended up being linear time with no interaction.

# Model parameterizations:

- Linear, no interaction = intercept, baseline BPI worst pain score, waitlist control intervention (1=yes, 0=no), sham control intervention (1=year, 0=no), time, and the stratification factors (3 indicator variables for site type)
- Linear, interaction = intercept, baseline BPI worst pain score, waitlist control intervention (1=yes, 0=no), sham control intervention (1=year, 0=no), time, waitlist control intervention\*time, sham control intervention\*time, and the stratification factors (3 indicator variables for site type)
- Square, no interaction = intercept, baseline BPI worst pain score, waitlist control intervention (1=yes, 0=no), sham control intervention (1=year, 0=no), time, time\*time, and the stratification factors (3 indicator variables for site type)
- Square, interaction = intercept, baseline BPI worst pain score, waitlist control intervention (1=yes, 0=no), sham control intervention (1=year, 0=no), time, time\*time, waitlist control intervention\*time, waitlist control intervention\*time\*time, sham control intervention\*time, sham control intervention\*time\*time, and the stratification factors (3 indicator variables for site type)

**eTable 3.** Grip Strength, Maximal Contraction Over Left and Right Hand, by Randomized Arm and Time Point

| Time Point | True Acupuncture<br>Mean (SD)<br>Median<br>N | Sham Acupuncture<br>Mean (SD)<br>Median<br>N | Waitlist Control<br>Mean (SD)<br>Median<br>N |
|------------|----------------------------------------------|----------------------------------------------|----------------------------------------------|
| Baseline   | 22.8 (10.0)<br>21.5<br>N=110                 | 25.5 (15.1)<br>21.0<br>N=58                  | 24.1 (12.1)<br>22.6<br>N=55                  |
| 6 weeks    | 24.1 (9.5)<br>23.5<br>N=100                  | 26.0 (16.4)<br>22.7<br>N=53                  | 24.6 (10.3)<br>23.7<br>N=49                  |
| 12 weeks   | 23.8 (9.8)<br>23.7<br>N=100                  | 24.0 (13.8)<br>21.5<br>N=53                  | 24.3 (10.6)<br>24.1<br>N=50                  |
| 24 weeks   | 24.3 (9.2)<br>23.3<br>N=94                   | 24.1 (11.7)<br>23.6<br>N=53                  | 24.8 (10.7)<br>24.0<br>N=49                  |
| 52 weeks   | 23.8 (8.8)<br>23.9<br>N=90                   | 24.6 (8.1)<br>24.4<br>N=50                   | 26.2 (11.0)<br>24.6<br>N=47                  |

**eTable 4.** Grip Strength, Change in Maximal Contraction Between Follow-up and Baseline by Randomized Arm and Time Point

| Time Point | True Acupuncture<br>Mean (SD)<br>Median<br>N | Sham Acupuncture<br>Mean (SD)<br>Median<br>N | Waitlist Control<br>Mean (SD)<br>Median<br>N | P value (ANOVA),<br>difference in<br>mean change<br>from baseline |
|------------|----------------------------------------------|----------------------------------------------|----------------------------------------------|-------------------------------------------------------------------|
| 6 weeks    | 1.1 (6.3)<br>0.9<br>N=100                    | 0.3 (11.2)<br>1.5<br>N=53                    | -0.2 (8.2)<br>0.6<br>N=49                    | 0.67                                                              |
| 12 weeks   | 0.9 (5.8)<br>1.3<br>N=100                    | -1.5 (11.3)<br>0.8<br>N=53                   | -0.4 (8.1)<br>0.8<br>N=50                    | 0.20                                                              |
| 24 weeks   | 1.1 (7.4)<br>1.6<br>N=94                     | -1.5 (12.2)<br>1.4<br>N=53                   | 0.2 (9.0)<br>1.2<br>N=49                     | 0.28                                                              |
| 52 weeks   | 0.4 (8.7)<br>1.3<br>N=90                     | -1.4 (14.7)<br>1.4<br>N=50                   | 1.2 (9.9)<br>1.6<br>N=47                     | 0.50                                                              |

**eTable 5.** Timed Get Up and Go, by Randomized Arm and Time Point

| Time Point | True Acupuncture<br>Mean (SD)<br>Median<br>N | Sham Acupuncture<br>Mean (SD)<br>Median<br>N | Waitlist Control<br>Mean (SD)<br>Median<br>N |
|------------|----------------------------------------------|----------------------------------------------|----------------------------------------------|
| Baseline   | 13.2 (13.9)<br>10.6<br>N=110                 | 11.9 (9.4)<br>10.1<br>N=58                   | 10.8 (4.0)<br>10.0<br>N=55                   |
| 6 weeks    | 10.4 (6.6)<br>9.5<br>N=100                   | 10.8 (8.4)<br>9.2<br>N=53                    | 10.0 (3.9)<br>9.0<br>N=49                    |
| 12 weeks   | 12.1 (13.8)<br>9.1<br>N=100                  | 10.8 (10.6)<br>9.0<br>N=53                   | 9.7 (3.7)<br>9.0<br>N=49                     |
| 24 weeks   | 11.5 (16.0)<br>8.9<br>N=95                   | 10.5 (8.7)<br>8.9<br>N=53                    | 9.5 (2.9)<br>8.4<br>N=49                     |
| 52 weeks   | 9.5 (3.9)<br>8.7<br>N=90                     | 9.2 (2.6)<br>8.5<br>N=50                     | 8.9 (2.2)<br>8.6<br>N=47                     |



**eTable 6.** Timed Get Up and Go, Change Between Follow-up and Baseline, by Randomized Arm and Time Point

| Time Point | True Acupuncture<br>Mean (SD)<br>Median<br>N | Sham Acupuncture<br>Mean (SD)<br>Median<br>N | Waitlist Control<br>Mean (SD)<br>Median<br>N | P value (ANOVA),<br>difference in<br>mean change<br>from baseline |
|------------|----------------------------------------------|----------------------------------------------|----------------------------------------------|-------------------------------------------------------------------|
| 6 weeks    | -2.6 (11.8)<br>-1.0<br>N=100                 | -1.2 (3.0)<br>-0.7<br>N=53                   | -0.6 (3.3)<br>-0.4<br>N=49                   | 0.35                                                              |
| 12 weeks   | -1.1 (7.6)<br>-1.1<br>N=100                  | -1.1 (14.2)<br>-0.8<br>N=53                  | -0.9 (3.5)<br>-0.4<br>N=49                   | 0.99                                                              |
| 24 weeks   | -1.6 (11.1)<br>-1.3<br>N=95                  | -1.4 (3.1)<br>-1.1<br>N=53                   | -1.1 (3.4)<br>-0.7<br>N=49                   | 0.94                                                              |
| 52 weeks   | -3.7 (14.8)<br>-1.4<br>N=90                  | -2.8 (9.9)<br>-0.9<br>N=50                   | -1.4 (3.5)<br>-0.6<br>N=47                   | 0.57                                                              |
