# Supplementary material for: Comparison of Acupuncture vs Sham Acupuncture or Waiting List Control in the Treatment of Aromatase Inhibitor–Related Joint Pain: A Randomized Clinical Trial
Source: PubMed Central journal article supplement (PMC9652759; doi:10.1001/jamanetworkopen.2022.41720), 2022-11-11
Supplement: jamanetwopen-e2241720-s003.pdf [file jamanetwopen-e2241720-s003.pdf]

## Data Sharing Statement

Hershman. Comparison of Acupuncture vs Sham Acupuncture or Waiting List Control in the Treatment of Aromatase Inhibitor-Related Joint Pain. *JAMA Netw Open*. Published November 11, 2022. doi:10.1001/jamanetworkopen.2022.41720

### Data

**Data available:** Yes

**Data types:** Deidentified participant data

**How to access data:** SWOG Statistical and Data Management Center

**When available:** With publication

### Supporting Documents

**Document types:** None

### Additional Information

**Who can access the data:** researchers whose proposed use of the data has been approved

**Types of analyses:** for any purpose

**Mechanisms of data availability:** after approval of a proposal and with a signed data access agreement
